# Supplementary material for: Aromatic clusters in protein–protein and protein–drug complexes
Source: PubMed Central journal article supplement (PMC7206889; doi:10.1186/s13321-020-00437-4), 2020-05-08
Supplement: 13321_2020_437_MOESM1_ESM.pdf [file 13321_2020_437_MOESM1_ESM.pdf]

# Supplementary information for

## Aromatic clusters in protein-protein and protein-drug complexes.

Esteban Lanzarotti<sup>1,#</sup>, Lucas A. Defelipe<sup>2,3,4,#</sup>, Marcelo A. Marti<sup>2,3</sup>, Adrián G.

Turjanski<sup>2,3\*</sup>

<sup>1</sup> Departamento de Computación, Facultad de Ciencias Exactas y Naturales, Universidad de Buenos Aires, Buenos Aires, Argentina.

<sup>2</sup> Departamento de Química Biológica, Facultad de Ciencias Exactas y Naturales, Universidad de Buenos Aires, Buenos Aires, Argentina.

<sup>3</sup> IQIBICEN/UBA-CONICET, Facultad de Ciencias Exactas y Naturales, Universidad de Buenos Aires, Buenos Aires, Argentina.

<sup>4</sup> European Molecular Biology Laboratory Hamburg, Notkestrasse 85, D-22607, Hamburg, Germany.

\* To whom correspondence should be addressed: [adrian@qb.fcen.uba.ar](mailto:adrian@qb.fcen.uba.ar)

#Both authors contributed equally

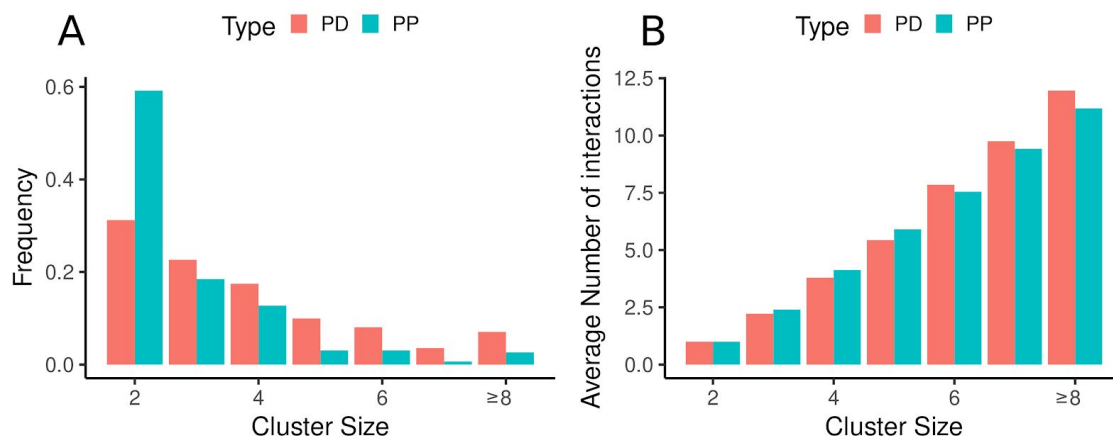

**Figure S1. Aromatic clusters size and average interactions** A) Aromatic cluster frequency for each dataset, Red for Protein-Drug, cyan for Protein-Protein. B) The average number of interactions by cluster size, Red for Protein-Drug, cyan for Protein-Protein.

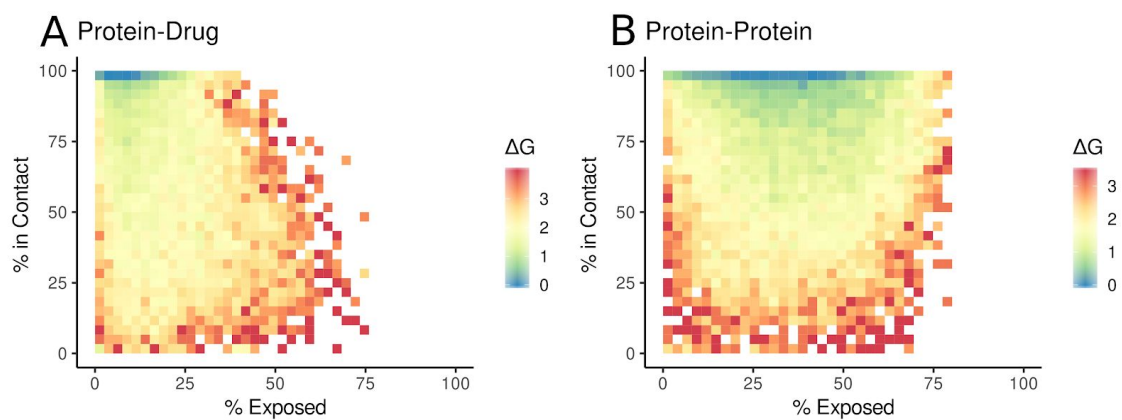

**Figure S2. Solvent Accessibility and Contact Surface.** A) % in Contact vs % Solvent-exposed for aromatic residues interacting with drugs. B) % in Contact vs % Solvent-exposed for aromatic residues interacting in protein-protein interfaces. The color scale is a Delta G energy computed with Boltzmann Equation with a temperature of 298K.

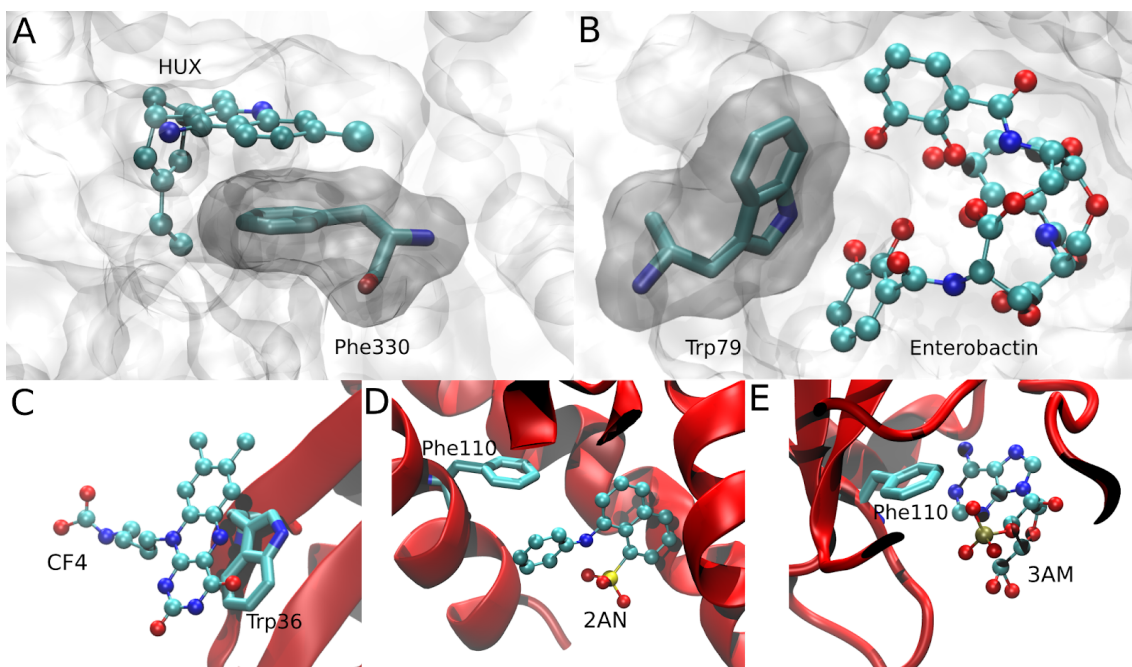

**Figure S3. Structural examples from Figure 3.** A) Example of a < 20% exposed aromatic residue. PDBID 1E66 F) Example of a > 20% exposed aromatic residue. 3CMP G) Aromatic residue in Sheet conformation. 2VKG H) Aromatic residue in Helix conformation. 1OW4 I) Aromatic residue in Loop conformation. 3AGN

Ladder

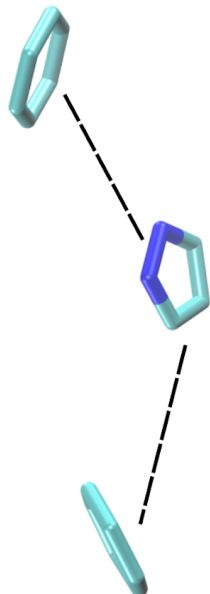

Symmetric

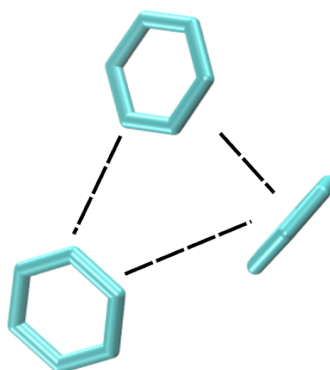

**Figure S4. Conformations of aromatic trimers in protein-drug interactions. Left.** Ladder structure of Phe 80, the Pyrazole ring of AT7519 and Phe 82 of *HsCDK2* complex (PDBId 2VTQ). **Right.** Symmetric structure of Phe 24, Phe 146 and Benzene ring of Penicillin G of *Ec. Penicillin Acylase* (PDBId 1FXV). Only aromatic rings are shown. The dashed line indicates interactions between the aromatic rings.

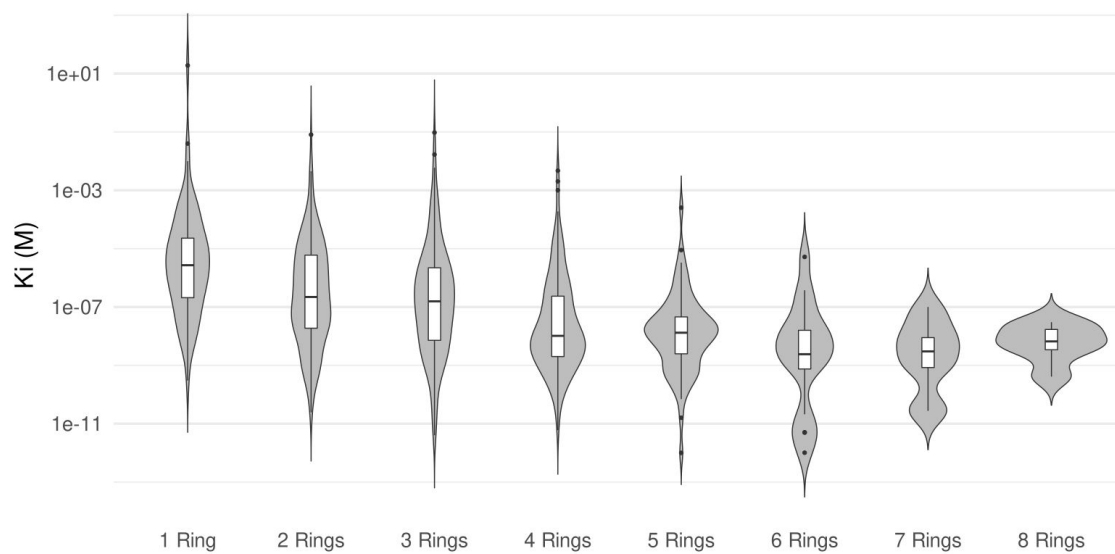

**Figure S5.** Number of aromatic rings in a protein-drug complex against interaction affinity ( $K_i$ ).  $K_i$  is plotted in logarithmic scale.

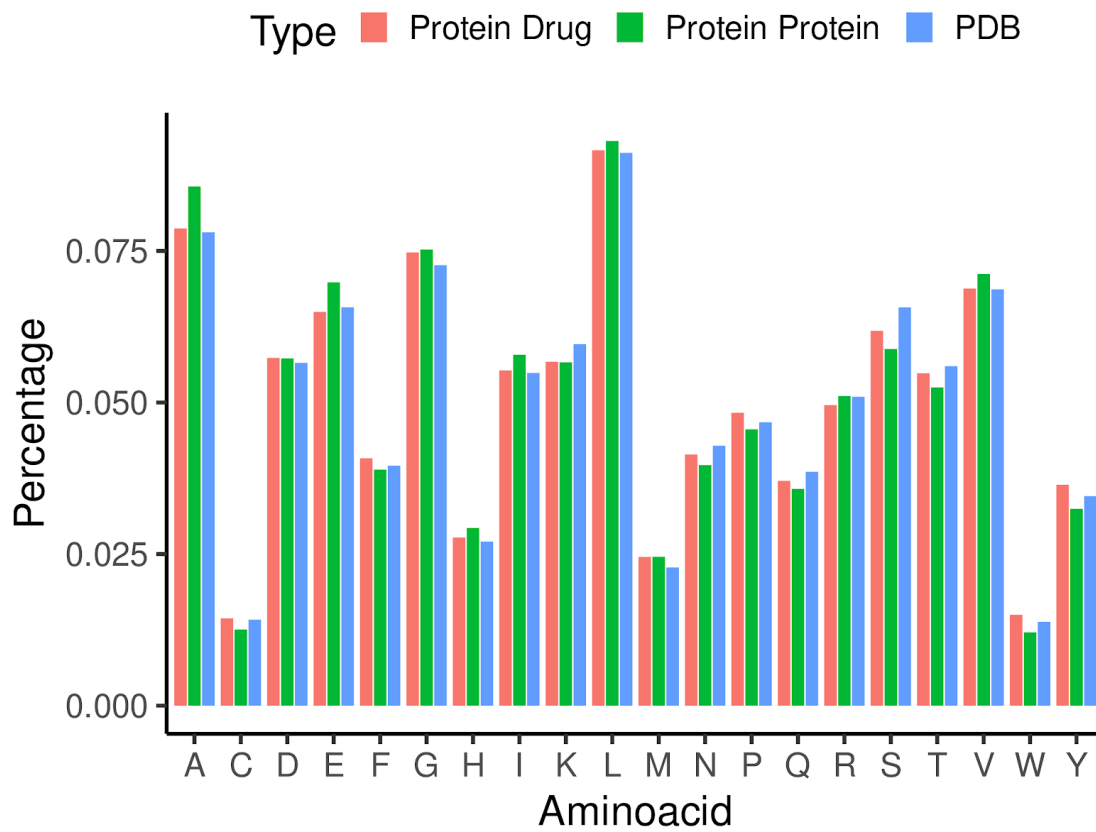

**Figure S6. Database aminoacid composition bias.** Average aminoacid composition of the proteins in the Protein-Drug and Protein-Protein datasets compared to the whole Protein Data Bank (PDB).

| <b>Type of trimer</b> | <b>Protein-Drug</b> | <b>Protein-Protein</b> |
|-----------------------|---------------------|------------------------|
| <i>LAD Trimers</i>    | 1,283               | 1,126                  |
| <i>SYM Trimers</i>    | 358                 | 294                    |

**Table S1. Number of Aromatic trimers classified by structural properties.**



|                                                                        |              |
|------------------------------------------------------------------------|--------------|
| <b>Protein-drug (PD)</b>                                               |              |
| <b>PDBs with ligands appearing in more than 10 different crystals.</b> | <b>20610</b> |
| <b>Removing ligands having less than 100 Da.</b>                       | <b>19422</b> |
| <b>Redundancy elimination applying a 95% sequence identity.</b>        | <b>13302</b> |
| <b>Only high-quality crystals with less than 2.5 resolution.</b>       | <b>10231</b> |
| <b>Protein-protein (PD)</b>                                            |              |
| <b>PDBs having only two chains</b>                                     | <b>23330</b> |
| <b>Explicitly mentioned as DIMER in REMARK 350 header</b>              | <b>11097</b> |
| <b>Redundancy elimination applying a 95% sequence identity.</b>        | <b>6224</b>  |
| <b>Only high-quality crystals with less than 2.5 resolution.</b>       | <b>4837</b>  |

**Table S2.** Filtration steps used to produce protein-drug and Protein-protein datasets.

| <b>Aromatic ring name</b> | <b>Number in the PD dataset</b> |
|---------------------------|---------------------------------|
| benzene                   | 11404                           |
| pyrimidine                | 2372                            |
| pyridine                  | 1653                            |
| imidazole                 | 1260                            |
| pyrrole                   | 1004                            |
| NOT SPECIFIED             | 579                             |
| thiophene                 | 366                             |
| pyrazole                  | 293                             |
| thiazole                  | 253                             |
| pyrazine                  | 232                             |
| Pyrazole anion            | 227                             |
| furan                     | 179                             |
| isoxazole                 | 116                             |
| oxazole                   | 78                              |
| pyridazine                | 63                              |
| 1,2,4-triazole            | 56                              |
| Thiazole cation           | 47                              |
| 1,3,4-triazole            | 42                              |
| 1,2,3-triazole            | 38                              |
| imidazole_cation          | 37                              |
| 1,2,4-oxadiazole          | 29                              |
| 1,3,4-thiadiazol          | 28                              |
| 1,2,3,5-tetrazole         | 28                              |
| 1,2,4-triazole_a          | 17                              |
| 1,2,3-triazole_a          | 12                              |
| 1,2,3,4-tetrazole         | 10                              |
| 1,3,4-triazole_c          | 6                               |
| isothiazole               | 6                               |
| Oxazole cation            | 5                               |
| 1,2,3-thiadiazol          | 4                               |
| Isoxazole cation          | 2                               |
| Isothiazole cation        | 1                               |

**Table S3.** Number of rings by type in the protein-drug dataset.
